# Supplementary material for: Identifying Driver Genomic Alterations in Cancers by Searching Minimum-Weight, Mutually Exclusive Sets
Source: PubMed Central journal article supplement (PMC4552843; doi:10.1371/journal.pcbi.1004257), 2015-08-28
Supplement: pcbi.1004257.s001.pdf [file pcbi.1004257.s001.pdf]

**Table S1- Literature search shows that besides AURKA and CCNB1, seven other genes in the RM U\_G00051128 (OV) are related to cancers.**

| Gene   | Reference |
|--------|-----------|
| CHEK1  | [1-3]     |
| EPHB3  | [4,5]     |
| NEK2   | [6,7]     |
| STMN1  | [8-11]    |
| TACC3  | [12]      |
| THBS2  | [13]      |
| TWIST1 | [14-16]   |

### References for the Supplementary

1. Desmarais JA, Hoffmann MJ, Bingham G, Gagou ME, Meuth M, et al. (2012) Human embryonic stem cells fail to activate CHK1 and commit to apoptosis in response to DNA replication stress. *Stem Cells* 30: 1385-1393.
2. Herman-Antosiewicz A, Singh SV (2005) Checkpoint kinase 1 regulates diallyl trisulfide-induced mitotic arrest in human prostate cancer cells. *J Biol Chem* 280: 28519-28528.
3. Connell CM, Shibata A, Tookman LA, Archibald KM, Flak MB, et al. (2011) Genomic DNA damage and ATR-Chk1 signaling determine oncolytic adenoviral efficacy in human ovarian cancer cells. *J Clin Invest* 121: 1283-1297.
4. Ji XD, Li G, Feng YX, Zhao JS, Li JJ, et al. (2011) EphB3 is overexpressed in non-small-cell lung cancer and promotes tumor metastasis by enhancing cell survival and migration. *Cancer Res* 71: 1156-1166.
5. Chiu ST, Chang KJ, Ting CH, Shen HC, Li H, et al. (2009) Over-expression of EphB3 enhances cell-cell contacts and suppresses tumor growth in HT-29 human colon cancer cells. *Carcinogenesis* 30: 1475-1486.
6. Liu Z, Wang Y, Wang S, Zhang J, Zhang F, et al. (2012) Nek2C functions as a tumor promoter in human breast tumorigenesis. *Int J Mol Med* 30: 775-782.
7. Tsunoda N, Kokuryo T, Oda K, Senga T, Yokoyama Y, et al. (2009) Nek2 as a novel molecular target for the treatment of breast carcinoma. *Cancer Sci* 100: 111-116.
8. Trovik J, Wik E, Stefansson IM, Marcickiewicz J, Tingulstad S, et al. (2011) Stathmin overexpression identifies high-risk patients and lymph node metastasis in endometrial cancer. *Clin Cancer Res* 17: 3368-3377.
9. Jeon TY, Han ME, Lee YW, Lee YS, Kim GH, et al. (2010) Overexpression of stathmin1 in the diffuse type of gastric cancer and its roles in proliferation and migration of gastric cancer cells. *Br J Cancer* 102: 710-718.
10. Sonogo M, Schiappacassi M, Lovisa S, Dall'Acqua A, Bagnoli M, et al. (2013) Stathmin regulates mutant p53 stability and transcriptional activity in ovarian cancer. *EMBO Mol Med* 5: 707-722.
11. Wei SH, Lin F, Wang X, Gao P, Zhang HZ (2008) Prognostic significance of stathmin expression in correlation with metastasis and clinicopathological characteristics in human ovarian carcinoma. *Acta Histochem* 110: 59-65.

12. Yim EK, Tong SY, Ho EM, Bae JH, Um SJ, et al. (2009) Anticancer effects on TACC3 by treatment of paclitaxel in HPV-18 positive cervical carcinoma cells. *Oncol Rep* 21: 549-557.
13. Linton A, Cheng YY, Griggs K, Kirschner MB, Gattani S, et al. (2014) An RNAi-based screen reveals PLK1, CDK1 and NDC80 as potential therapeutic targets in malignant pleural mesothelioma. *Br J Cancer* 110: 510-519.
14. Wang WS, Yang XS, Xia M, Jiang HY, Hou JQ (2012) Silencing of twist expression by RNA interference suppresses epithelial-mesenchymal transition, invasion, and metastasis of ovarian cancer. *Asian Pac J Cancer Prev* 13: 4435-4439.
15. Yin G, Alvero AB, Craveiro V, Holmberg JC, Fu HH, et al. (2013) Constitutive proteasomal degradation of TWIST-1 in epithelial-ovarian cancer stem cells impacts differentiation and metastatic potential. *Oncogene* 32: 39-49.
16. Sun T, Zhao N, Zhao XL, Gu Q, Zhang SW, et al. (2010) Expression and functional significance of Twist1 in hepatocellular carcinoma: its role in vasculogenic mimicry. *Hepatology* 51: 545-556.
