# Supplementary material for: Identifying Driver Genomic Alterations in Cancers by Searching Minimum-Weight, Mutually Exclusive Sets
Source: PubMed Central journal article supplement (PMC4552843; doi:10.1371/journal.pcbi.1004257), 2015-08-28
Supplement: pcbi.1004257.s003.pdf [file pcbi.1004257.s003.pdf]

**Table S3 - Seventeen RMs from OV and GBM overlap significantly**

| RM_ID        | GO term<br>gene count | RM size<br>(OV) | RM size<br>(GBM) | Common<br>count | Overlap p-value | q_values |
|--------------|-----------------------|-----------------|------------------|-----------------|-----------------|----------|
| U_GO0022403  | 505                   | 31              | 35               | 22              | 1.42E-22        | 5.40E-21 |
| U_GO0007067  | 186                   | 17              | 18               | 15              | 2.27E-17        | 4.31E-16 |
| U_GO00051726 | 527                   | 22              | 27               | 15              | 6.04E-17        | 7.65E-16 |
| U_GO0000278  | 319                   | 22              | 30               | 17              | 3.83E-16        | 3.64E-15 |
| U_GO0006259  | 619                   | 20              | 19               | 11              | 9.71E-14        | 6.84E-13 |
| U_GO0000226  | 180                   | 15              | 15               | 12              | 1.19E-13        | 6.84E-13 |
| U_GO0006974  | 554                   | 14              | 19               | 10              | 1.26E-13        | 6.84E-13 |
| U_GO0000087  | 94                    | 15              | 19               | 14              | 9.42E-12        | 4.47E-11 |
| U_GO0000075  | 216                   | 18              | 19               | 12              | 4.88E-11        | 2.06E-10 |
| U_GO0000236  | 84                    | 14              | 18               | 13              | 1.79E-10        | 6.74E-10 |
| U_GO0006996  | 1116                  | 13              | 19               | 7               | 1.95E-10        | 6.74E-10 |
| U_GO0034984  | 490                   | 12              | 19               | 8               | 4.43E-10        | 1.40E-09 |
| U_GO0009615  | 194                   | 13              | 17               | 9               | 1.67E-08        | 4.88E-08 |
| U_GO0009611  | 467                   | 10              | 30               | 6               | 7.45E-06        | 2.02E-05 |
| U_GO0030198  | 122                   | 11              | 19               | 8               | 9.88E-06        | 2.50E-05 |
| U_GO0007242  | 1286                  | 14              | 18               | 4               | 2.47E-05        | 5.87E-05 |
| U_GO0007596  | 460                   | 10              | 21               | 5               | 2.63E-05        | 5.88E-05 |
