# Supplementary material for: Identifying Driver Genomic Alterations in Cancers by Searching Minimum-Weight, Mutually Exclusive Sets
Source: PubMed Central journal article supplement (PMC4552843; doi:10.1371/journal.pcbi.1004257), 2015-08-28
Supplement: pcbi.1004257.s004.pdf [file pcbi.1004257.s004.pdf]

**Table S4 - Literature study indicates that most genes in the RMs U\_G00007067 from OV and GBM are related to cancers**

| Gene  | Reference | Gene     | Reference |
|-------|-----------|----------|-----------|
| ASPM  | [1,2]     | OIP5     | [3,4]     |
| AURKA | [5-7]     | PBK      | [8]       |
| BIRC5 | [9,10]    | PTTG1    | [11,12]   |
| BUB1B | [13,14]   | TIMELESS | [15,16]   |
| CCNA2 | [17,18]   | TPX2     | [7,19]    |
| CCNB2 | [20,21]   | UBE2C    | [22-24]   |
| CEP55 | [25]      | WEE1     | [26,27]   |
| KIF23 | [28]      |          |           |
| KIF2C | [29,30]   |          |           |
| NDC80 | [31,32]   |          |           |

### References for the Supplementary

1. Wang WY, Hsu CC, Wang TY, Li CR, Hou YC, et al. (2013) A gene expression signature of epithelial tubulogenesis and a role for ASPM in pancreatic tumor progression. *Gastroenterology* 145: 1110-1120.
2. Vulcani-Freitas TM, Saba-Silva N, Cappellano A, Cavalheiro S, Marie SK, et al. (2011) ASPM gene expression in medulloblastoma. *Childs Nerv Syst* 27: 71-74.
3. Chun HK, Chung KS, Kim HC, Kang JE, Kang MA, et al. (2010) OIP5 is a highly expressed potential therapeutic target for colorectal and gastric cancers. *BMB Rep* 43: 349-354.
4. Koinuma J, Akiyama H, Fujita M, Hosokawa M, Tsuchiya E, et al. (2012) Characterization of an Opa interacting protein 5 involved in lung and esophageal carcinogenesis. *Cancer Sci* 103: 577-586.
5. Do TV, Xiao F, Bickel LE, Klein-Szanto AJ, Pathak HB, et al. (2014) Aurora kinase A mediates epithelial ovarian cancer cell migration and adhesion. *Oncogene* 33: 539-549.
6. Goos JA, Coupe VM, Diosdado B, Delis-Van Diemen PM, Karga C, et al. (2013) Aurora kinase A (AURKA) expression in colorectal cancer liver metastasis is associated with poor prognosis. *Br J Cancer* 109: 2445-2452.
7. Sillars-Hardebol AH, Carvalho B, Tijssen M, Belien JA, de Wit M, et al. (2012) TPX2 and AURKA promote 20q amplicon-driven colorectal adenoma to carcinoma progression. *Gut* 61: 1568-1575.
8. Simons-Evelyn M, Bailey-Dell K, Toretsky JA, Ross DD, Fenton R, et al. (2001) PBK/TOPK is a novel mitotic kinase which is upregulated in Burkitt's lymphoma and other highly proliferative malignant cells. *Blood Cells Mol Dis* 27: 825-829.
9. Cascione L, Gasparini P, Lovat F, Carasi S, Pulvirenti A, et al. (2013) Integrated microRNA and mRNA signatures associated with survival in triple negative breast cancer. *PLoS One* 8: e55910.
10. Boidot R, Vegran F, Jacob D, Chevrier S, Gangneux N, et al. (2008) The expression of BIRC5 is correlated with loss of specific chromosomal regions in breast carcinomas. *Genes Chromosomes Cancer* 47: 299-308.

11. Demeure MJ, Coan KE, Grant CS, Komorowski RA, Stephan E, et al. (2013) PTTG1 overexpression in adrenocortical cancer is associated with poor survival and represents a potential therapeutic target. *Surgery* 154: 1405-1416; discussion 1416.
12. Salehi F, Scheithauer BW, Sharma S, Kovacs K, Lloyd RV, et al. (2013) Immunohistochemical expression of PTTG in brain tumors. *Anticancer Res* 33: 119-122.
13. Ding Y, Hubert CG, Herman J, Corrin P, Toledo CM, et al. (2013) Cancer-Specific requirement for BUB1B/BUBR1 in human brain tumor isolates and genetically transformed cells. *Cancer Discov* 3: 198-211.
14. Ando K, Kakeji Y, Kitao H, Iimori M, Zhao Y, et al. (2010) High expression of BUBR1 is one of the factors for inducing DNA aneuploidy and progression in gastric cancer. *Cancer Sci* 101: 639-645.
15. Yoshida K, Sato M, Hase T, Elshazley M, Yamashita R, et al. (2013) TIMELESS is overexpressed in lung cancer and its expression correlates with poor patient survival. *Cancer Sci* 104: 171-177.
16. Fu A, Leaderer D, Zheng T, Hoffman AE, Stevens RG, et al. (2012) Genetic and epigenetic associations of circadian gene TIMELESS and breast cancer risk. *Mol Carcinog* 51: 923-929.
17. Santala S, Talvensaaari-Mattila A, Soini Y, Honkavuori-Toivola M, Santala M (2014) High expression of cyclin A is associated with poor prognosis in endometrial endometrioid adenocarcinoma. *Tumour Biol* 35: 5395-5399.
18. Dunican DS, McWilliam P, Tighe O, Parle-McDermott A, Croke DT (2002) Gene expression differences between the microsatellite instability (MIN) and chromosomal instability (CIN) phenotypes in colorectal cancer revealed by high-density cDNA array hybridization. *Oncogene* 21: 3253-3257.
19. Li B, Qi XQ, Chen X, Huang X, Liu GY, et al. (2010) Expression of targeting protein for Xenopus kinesin-like protein 2 is associated with progression of human malignant astrocytoma. *Brain Res* 1352: 200-207.
20. Stav D, Bar I, Sandbank J (2007) Usefulness of CDK5RAP3, CCNB2, and RAGE genes for the diagnosis of lung adenocarcinoma. *Int J Biol Markers* 22: 108-113.
21. Shubbar E, Kovacs A, Hajizadeh S, Parris TZ, Nemes S, et al. (2013) Elevated cyclin B2 expression in invasive breast carcinoma is associated with unfavorable clinical outcome. *BMC Cancer* 13: 1.
22. Morikawa T, Kawai T, Abe H, Kume H, Homma Y, et al. (2013) UBE2C is a marker of unfavorable prognosis in bladder cancer after radical cystectomy. *Int J Clin Exp Pathol* 6: 1367-1374.
23. Psyrri A, Kalogeris KT, Kronenwett R, Wirtz RM, Batistatou A, et al. (2012) Prognostic significance of UBE2C mRNA expression in high-risk early breast cancer. A Hellenic Cooperative Oncology Group (HeCOG) Study. *Ann Oncol* 23: 1422-1427.
24. Bose MV, Gopisetty G, Selvaluxmy G, Rajkumar T (2012) Dominant negative Ubiquitin-conjugating enzyme E2C sensitizes cervical cancer cells to radiation. *Int J Radiat Biol* 88: 629-634.
25. Waseem A, Ali M, Odell EW, Fortune F, Teh MT (2010) Downstream targets of FOXM1: CEP55 and HELLS are cancer progression markers of head and neck squamous cell carcinoma. *Oral Oncol* 46: 536-542.
26. Mir SE, De Witt Hamer PC, Krawczyk PM, Balaj L, Claes A, et al. (2010) In silico analysis of kinase expression identifies WEE1 as a gatekeeper against mitotic catastrophe in glioblastoma. *Cancer Cell* 18: 244-257.
27. Magnussen GI, Holm R, Emilsen E, Rosnes AK, Slipicevic A, et al. (2012) High expression of Wee1 is associated with poor disease-free survival in malignant melanoma: potential for targeted therapy. *PLoS One* 7: e38254.
28. Takahashi S, Fusaki N, Ohta S, Iwahori Y, Iizuka Y, et al. (2012) Downregulation of KIF23 suppresses glioma proliferation. *J Neurooncol* 106: 519-529.

29. Gnjatic S, Cao Y, Reichelt U, Yekebas EF, Nolker C, et al. (2010) NY-CO-58/KIF2C is overexpressed in a variety of solid tumors and induces frequent T cell responses in patients with colorectal cancer. *Int J Cancer* 127: 381-393.
30. Shimo A, Tanikawa C, Nishidate T, Lin ML, Matsuda K, et al. (2008) Involvement of kinesin family member 2C/mitotic centromere-associated kinesin overexpression in mammary carcinogenesis. *Cancer Sci* 99: 62-70.
31. Bieche I, Vacher S, Lallemand F, Tozlu-Kara S, Bennani H, et al. (2011) Expression analysis of mitotic spindle checkpoint genes in breast carcinoma: role of NDC80/HEC1 in early breast tumorigenicity, and a two-gene signature for aneuploidy. *Mol Cancer* 10: 23.
32. Linton A, Cheng YY, Griggs K, Kirschner MB, Gattani S, et al. (2014) An RNAi-based screen reveals PLK1, CDK1 and NDC80 as potential therapeutic targets in malignant pleural mesothelioma. *Br J Cancer* 110: 510-519.
