# Supplementary material for: Identifying Driver Genomic Alterations in Cancers by Searching Minimum-Weight, Mutually Exclusive Sets
Source: PubMed Central journal article supplement (PMC4552843; doi:10.1371/journal.pcbi.1004257), 2015-08-28
Supplement: pcbi.1004257.s005.pdf [file pcbi.1004257.s005.pdf]

**Table S5 - Kaplan-Meier analysis of RMs from GBM shows that the expression states of 25 RMs are significantly associated with patients' clinical outcome**

| RM          | p-value    | q-value   |  | RM          | p-value     | q-value  |
|-------------|------------|-----------|--|-------------|-------------|----------|
| U_GO0050793 | 3.01E-05   | 0.0020197 |  | U_GO0010646 | 0.004761394 | 0.022821 |
| U_GO0042592 | 6.87E-05   | 0.0023049 |  | U_GO0009966 | 0.005467702 | 0.024459 |
| U_GO0048513 | 0.0001818  | 0.0034745 |  | U_GO0012501 | 0.006062865 | 0.025426 |
| U_GO0009611 | 0.00020712 | 0.0034745 |  | U_GO0006915 | 0.007285621 | 0.026724 |
| U_GO0007165 | 0.00028114 | 0.0037728 |  | U_GO0048545 | 0.007316108 | 0.026724 |
| U_GO0043067 | 0.00096769 | 0.0108221 |  | U_GO0048878 | 0.007849759 | 0.026724 |
| U_GO0009725 | 0.00118812 | 0.011389  |  | U_GO0043062 | 0.007965369 | 0.026724 |
| U_GO0006954 | 0.00178206 | 0.0149471 |  | U_GO0030198 | 0.008670935 | 0.027276 |
| D_GO0043067 | 0.00242886 | 0.0181085 |  | U_GO0032496 | 0.008943006 | 0.027276 |
| U_GO0022603 | 0.00298315 | 0.020017  |  | U_GO0051270 | 0.01166546  | 0.033899 |
| U_GO0051239 | 0.00371628 | 0.021917  |  | U_GO0007596 | 0.01212466  | 0.033899 |
| D_GO0007166 | 0.00391957 | 0.021917  |  | U_GO0043066 | 0.01666711  | 0.044735 |
| U_GO0007242 | 0.0043813  | 0.0226143 |  |             |             |          |
