# Supplementary material for: Identifying Driver Genomic Alterations in Cancers by Searching Minimum-Weight, Mutually Exclusive Sets
Source: PubMed Central journal article supplement (PMC4552843; doi:10.1371/journal.pcbi.1004257), 2015-08-28
Supplement: pcbi.1004257.s006.pdf [file pcbi.1004257.s006.pdf]

**Table S6 - Using PASTTA (<http://trap.molgen.mpg.de/PASTAA.htm>), we found that E2F-1 is the most possible transcription factor that regulates the expressions of genes in the RM U\_G00051128 (OV)**

| Rank | Matrix               | Transcription Factor | Association Score | P-Value  |
|------|----------------------|----------------------|-------------------|----------|
| 1    | E2F_Q6_01            | Dp-1 , E2f-1         | 3.945             | 6.87E-04 |
| 2    | CACBINDINGPROTEIN_Q6 | N/A                  | 3.711             | 1.12E-03 |
| 3    | E2F_Q3_01            | Dp-1 , E2f-1         | 3.711             | 1.12E-03 |
| 4    | E2F1_Q4_01           | Dp-1 , E2f-1         | 3.514             | 1.65E-03 |
| 5    | E2F1_Q4              | E2f-1                | 3.475             | 1.76E-03 |
| 6    | AP2ALPHA_03          | N/A                  | 3.366             | 2.16E-03 |
| 7    | E2F_Q4_01            | Dp-1 , E2f-1         | 3.344             | 2.21E-03 |
| 8    | MYCMAX_02            | Max1 , C-myc         | 2.822             | 7.32E-03 |
| 9    | USF_Q6_01            | Usf-1 , Usf1         | 2.814             | 7.38E-03 |
| 10   | PU1_Q6               | Pu.1                 | 2.657             | 1.08E-02 |
| 11   | PAX4_03              | Pax-4a               | 2.587             | 1.15E-02 |
| 12   | E2F_03               | E2f-1                | 2.575             | 1.18E-02 |
