# Supplementary material for: Identifying Driver Genomic Alterations in Cancers by Searching Minimum-Weight, Mutually Exclusive Sets
Source: PubMed Central journal article supplement (PMC4552843; doi:10.1371/journal.pcbi.1004257), 2015-08-28
Supplement: pcbi.1004257.s008.pdf [file pcbi.1004257.s008.pdf]

**Figure S1 – Kaplan-Meier analysis of top 5 RMs that have strong impact on clinical outcome of TCGA GBM patients**

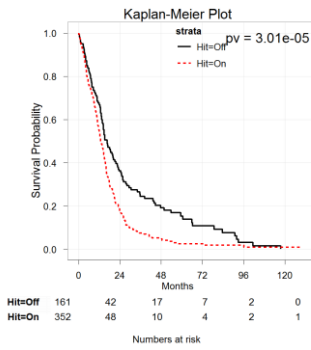

RM U\_GO0050793: regulation of developmental process

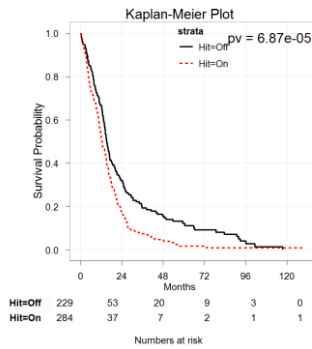

RM U\_GO0042592: homeostatic process

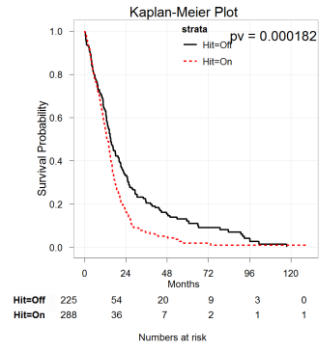

RM U\_GO0048513: organ development

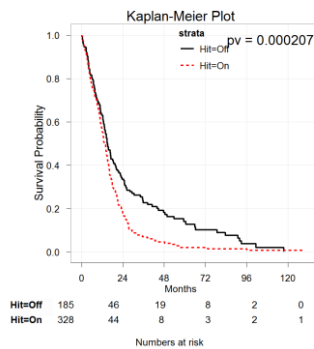

RM U\_GO0009611: response to wounding

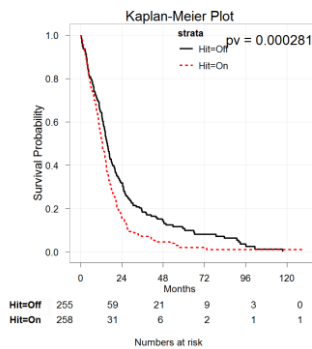

RM U\_GO0007165: signal transduction
